**Title:** A Chromosome-Level Genome Assembly for the Rock Ptarmigan (*Lagopus muta*)

**Authors and affiliations:** Theodore E. Squires\*<sup>1,2</sup>, Patrik Rödin-Mörch\*<sup>1,2</sup>, Giulio Formenti<sup>3</sup>, Alan Tracey<sup>4</sup>, Linelle Abueg<sup>3</sup>, Nadolina Brajuka<sup>3</sup>, Erich Jarvis<sup>3</sup>, Eva C. Halapi<sup>1</sup>, Páll Melsted<sup>5,6</sup>, Jacob Höglund<sup>2</sup>, and Kristinn Pétur Magnússon<sup>1,6,7</sup>

\*Co-first Authors

1. University of Akureyri, Faculty of Natural Resource Sciences, Akureyri, Iceland
2. Uppsala University, Uppsala Centre for Evolution and Genomics, Uppsala, Sweden
3. The Rockefeller University, New York, United States of America
4. Wellcome Sanger Institute, Hinxton, United Kingdom
5. University of Iceland, Department of Computer Science, Reykjavík, Iceland
6. Biomedical Center, University of Iceland, Reykjavík, Iceland
7. Icelandic Institute of Natural History, Akureyri, Iceland

**Corresponding author:** Kristinn Pétur Magnússon, PhD., Faculty of Natural Resource Sciences, University of Akureyri, Akureyri, Iceland, +354-590-0578, [kpm@unak.is](mailto:kpm@unak.is)

### **Abstract:**

The Rock Ptarmigan (*Lagopus muta*) is a cold-adapted, largely sedentary, game bird with a Holarctic distribution. The species represents an important example of an organism likely to be affected by ongoing climatic shifts across a disparate range. We provide here a high-quality reference genome and mitogenome for the Rock Ptarmigan assembled from PacBio HiFi and Hi-C sequencing of a female bird from Iceland. The total size of the genome is 1.03 Gb with a scaffold N50 of 71.23 Mb and a contig N50 of 17.91 Mb. The final scaffolds represent all 40 predicted chromosomes, and the mitochondria with a BUSCO score of 98.6%. Gene annotation resulted in 16,078 protein-coding genes out of a total 19,831 predicted (81.08% excluding pseudogenes). The genome included 21.07% repeat sequences, and the average length of genes, exons, and introns were, 33605, 394, and 4265 bp respectively. The availability of a new reference-quality genome will contribute to understanding the Rock Ptarmigan's unique evolutionary history, vulnerability to climate change, and demographic trajectories around the globe and serve as a reference genome for the species in the family Tetraonidae (order Galliformes).

**Key words:** Reference genome, PacBio Hifi, genomics, evolutionary biology

### **Introduction:**

The Rock Ptarmigan (*Lagopus muta*, Montin 1776) is a grouse species with a wide distribution across the arctic and subarctic northern hemisphere. It has seasonally variable plumage ranging from almost entirely white in the winter to heavily mottled grey, rust, and brown in the breeding months (see fig. 1). Birds of the genus *Lagopus* are notable for having feathered legs and feet which likely serve to insulate them in cold habitats. The Rock Ptarmigan can be considered as a ring species with variable genetic diversity across its circumpolar range (Sahlman et. al., 2009, Kozma et. al., 2019; see fig. 2). Accordingly, Rock Ptarmigan are expected to be at long-term risk across much of their range due to ongoing climatic changes and limited suitable habitat (Costanzi and Steifetten, 2019; Masanobu et al., 2019).

With the expected declines in cold specialist species as global temperatures rise (Chamberlain et al., 2012; Scheffers et al. 2016; Scridel et al., 2019; Höglund et al., 2021), non-migratory birds are particularly valuable to science as they are likely to display many special adaptations necessary for life in the arctic or at high altitude. Some populations of Rock Ptarmigan are considered near-threatened or endangered due to long-term population loss and expected habitat declines (Kozma et al., 2018; Nakamura, 2014; Icelandic Institute of Natural History, 2018). The risks associated with declining genetic quality and environmental changes are not well understood, but might be better assessed with genomic analysis (Bay et al., 2018; Formenti et al., 2022). For populations with robust historical demographics such as the Icelandic Rock Ptarmigan (Gardarsson, 1988; Brynjarsdóttir et al., 2003; Nielsen et al., 1986-2011), a locally sourced reference genome is valuable for assessing demographic history.

The species nearest relatives include other grouse in the subfamily Tetraoninae, although systematics in the order Galliformes remain poorly resolved. The mitochondrial genome of Rock Ptarmigan was previously made available along with the mitochondrial DNA of a sister species Willow Grouse (*Lagopus lagopus*; Sveinsdóttir and Magnússon, 2017). The Willow Grouse and Rock Ptarmigan are believed to have diverged as recently as 2-5 million years ago (Persons et al., 2016) and are often studied together (Kozma et al., 2018; Lucchini et al., 2001). The white-tailed ptarmigan (*Lagopus leucura*) is the most closely related species with whole genome data available, having a common ancestor with other *Lagopus* taxa no older than 3 million years ago, although the genome assembly is not currently annotated (Kozma et al., 2019; Clark et al., 2016; GenBank: GCA\_019238085.1).

Here, we describe the first reference-quality genome assembly and annotations for Rock Ptarmigan. A combination of long-read and conformation capture sequencing technologies were used to assemble a 1.03 Gb haploid reference genome.

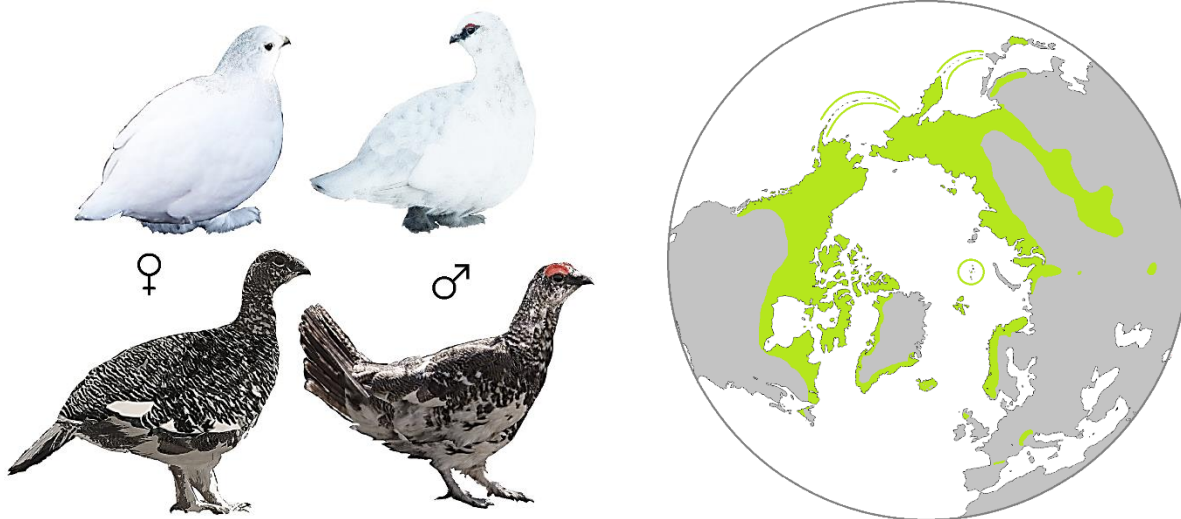

**Figure 1**

Sexually dimorphic seasonal molt patterns of adult Rock Ptarmigan showing white winter plumage and mottled breeding colors.

**Figure 2**

A range map showing the global distribution of Rock Ptarmigan above 30° north.

## **Materials and methods:**

### **Sample collection and PCR preparation:**

As basis for the reference genome assembly and annotation, fresh blood from a single female bird collected (shot) in Húsavík, northern Iceland, in 2018 was used (NCBI BioSample SAMN25144835) while additional, heart, muscle, brain, kidney, liver, ovaries, testes, and spleen from a second bird was collected for RNA-seq to aid in gene prediction (NCBI BioSample SAMN26436951, SAMN29421920, SAMN29421921, SAMN29421922, SAMN29421923, SAMN29421924, SAMN29421925, and SAMN29421926 respectively). DNA extraction was performed in the laboratories of SciLifeLab (Uppsala, Sweden). RNA was isolated, at University of Akureyri, using Beckman Coulter RNAClean XP (FisherScientific, USA). Materials from the birds used for the genome assembly are stored at the Icelandic Institute of Natural History in Garðabær, Iceland (Accession nr. RM13211).

### **Sequencing:**

Whole genome sequencing was carried out using two PacBio SMRT smart cells run on a Sequel II system at SciLifeLab in Uppsala, while Dovetail Genomics Hi-C Kits were processed on an Illumina NovaSeq 6000 at SciLifeLab in Stockholm. RNAseq was carried out on Illumina HiSeq2500 system Paired-end 2x125 cycles at deCODE genetics, Reykjavík.

### **Genome assembly:**

The genome was assembled following the Vertebrate Genome Project (VGP; Rhie, 2021) assembly pipeline. First, a kmer database was generated using Meryl (v. 1.3) from the PacBio HiFi reads for reference-free genome evaluation and downstream assembly QC. The kmer size was set to 21 after running the `best_k.sh` script for the expected genome size (~1Gb) in Merqury (v. 1.3; Rhie et al., 2020). PacBio HiFi reads were assembled using hifiasm (v. 0.15.1-r334; Cheng et al., 2021), followed by a round of `purge_dups` (v. 1.2.5; Guan et al., 2020) incorporating minimap2 (v. 2.17-r941). Each of the previous steps was followed by assembly evaluation. This included contig/scaffold statistics computed using the Python library `assembly_stats` (v. 0.1.4), and BUSCO (v. 5.3.1), while completeness and quality value statistics of the assembly along with kmer spectrum plots were produced using Merqury (v. 1.3; Rhie et al., 2020). The assembly was scaffolded using the Hi-C reads. Briefly, reads were first aligned to the assembly using the VGP modified version of the Arima mapping pipeline that uses `bwa mem` (v. 0.7.17-r1188) and `samtools` (v. 1.19) for alignment and `Picard` (v. 2.10.3) for 5' end filtering and duplication removal. Scaffolding was performed using `Salsa2` (v. 2.3) and evaluated using BUSCO and scaffold statistics.

The Hi-C reads were then mapped back to the scaffolded assembly using the same pipeline as in the previous step and the resulting bam file was converted to pretext format using `PretextView` (v. 0.1.7).

The finalized assembly was screened for contamination and then manually curated (Howe et al., 2021). Curation was performed using `gEVAL` (Chow et al., 2016) and Hi-C contact maps visualized in `HiGlass` (Kerpedjiev et al., 2018) and `PretextView` (v. 0.2.5), resulting in 97 missed or mis-join corrections to the

scaffolds producing a resolved chromosome level genome with 38 autosomes and, the Z and W sex chromosomes. Construction of microchromosomes was investigated using the Mummer alignment tool (v 4.0.0; Marçais et al., 2018) although poor syntany was noted for comparison with *Gallus gallus* and some likely remain unresolved.

The mitochondrial genome was assembled separately from both raw reads and contigs using MitoHifi (v. 2.2; Uliano-Silva et. al., 2021) with automatic alignment to the Japanese Rock Ptarmigan (*L. muta japonica*; Yonezawa and Nishibori, 2020) via built-in features from the MitoFinder dependency (v. 1.4.1; Allio et. al., 2020).

The completed genome assembly is publicly available in NCBI under accession number GCA\_023343835.1. The mitochondrial assembly is publicly available in NCBI under BankIt submission 2677809.

### **Genome annotation:**

The Rock Ptarmigan reference genome was annotated using the standard NCBI Eukaryotic Genome Annotation Pipeline version 10.0. A detailed summary of the pipeline is available online at: [https://www.ncbi.nlm.nih.gov/genome/annotation\\_euk/process/](https://www.ncbi.nlm.nih.gov/genome/annotation_euk/process/). In contrast to previous iterations, this version of the pipeline used RFAM (v. 14.6; Kalvari et al., 2021) for discovery of small non-coding RNA's and STAR (Dobin et al. 2013) for alignment of RNA-seq reads from our supplementary tissues. The pipeline has stable use of several tools including BUSCO (v. 4.1.4; Manni et al., 2021) and Splign (Kapustin et al., 2008) among others.

For calculation of genomic masking, the Rock Ptarmigan genome was masked with WindowMasker (Morgulis et al., 2006). Annotation of the mitochondrial genome was achieved via manual comparison with the extant published Icelandic Rock Ptarmigan mitogenome in addition to automatic annotation using MITOS WebServer (Bernt et. al., 2013).

### **Results:**

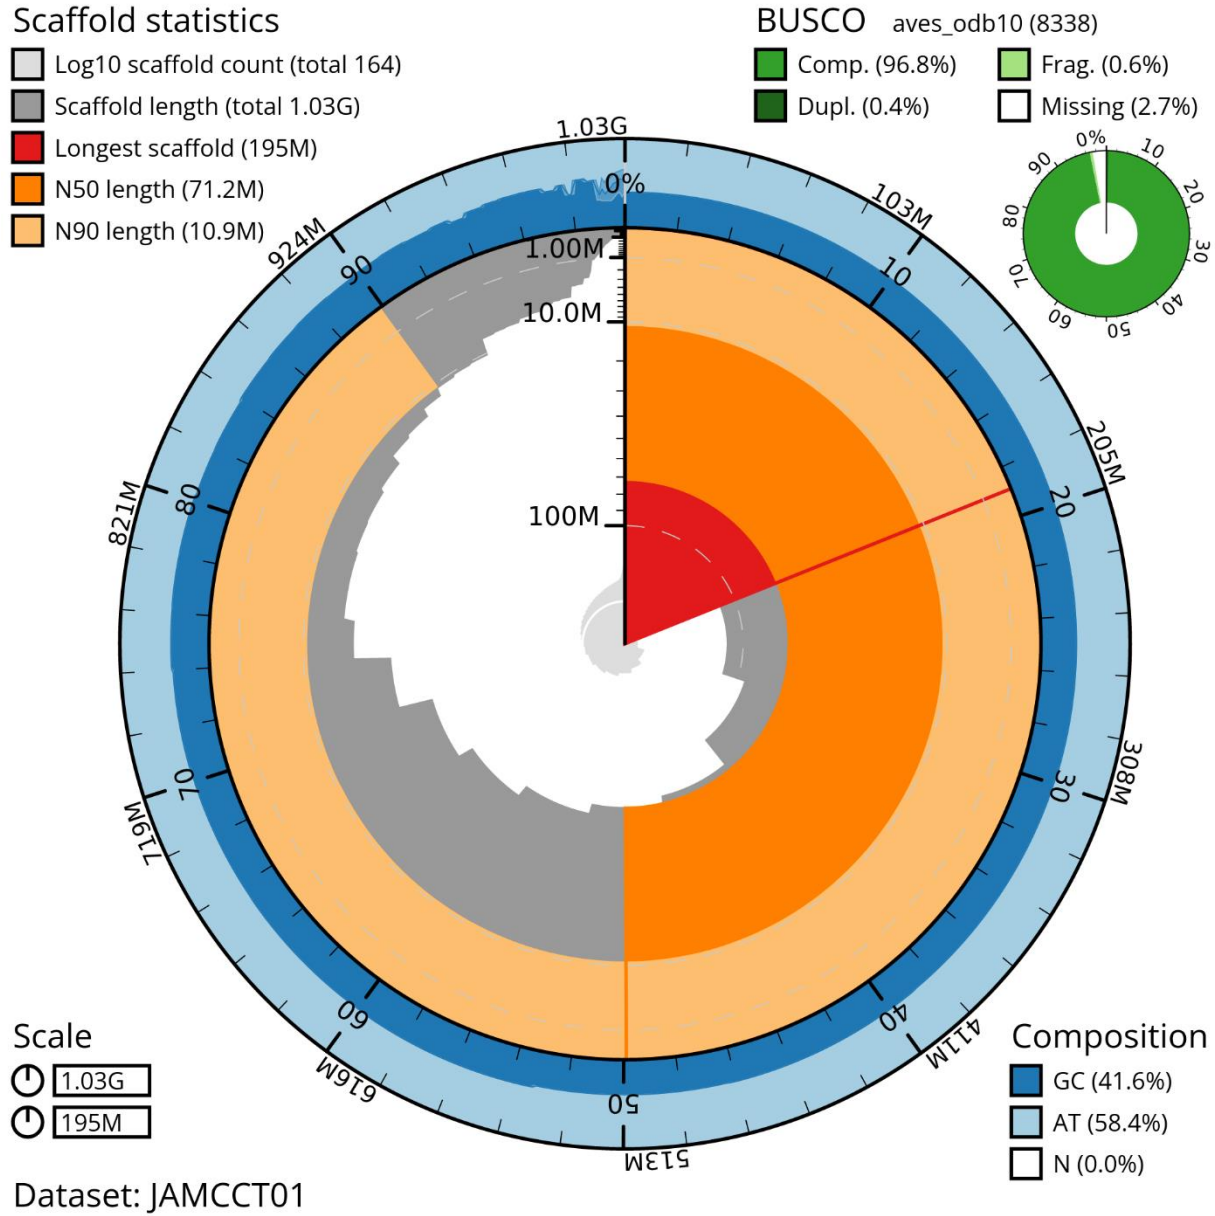

**Figure 3**

A snail plot indicating the completeness of the bLagMut1 genome assembly. Summary information about scaffold statistics, BUSCO, and the GC vs AT composition of various regions are included.

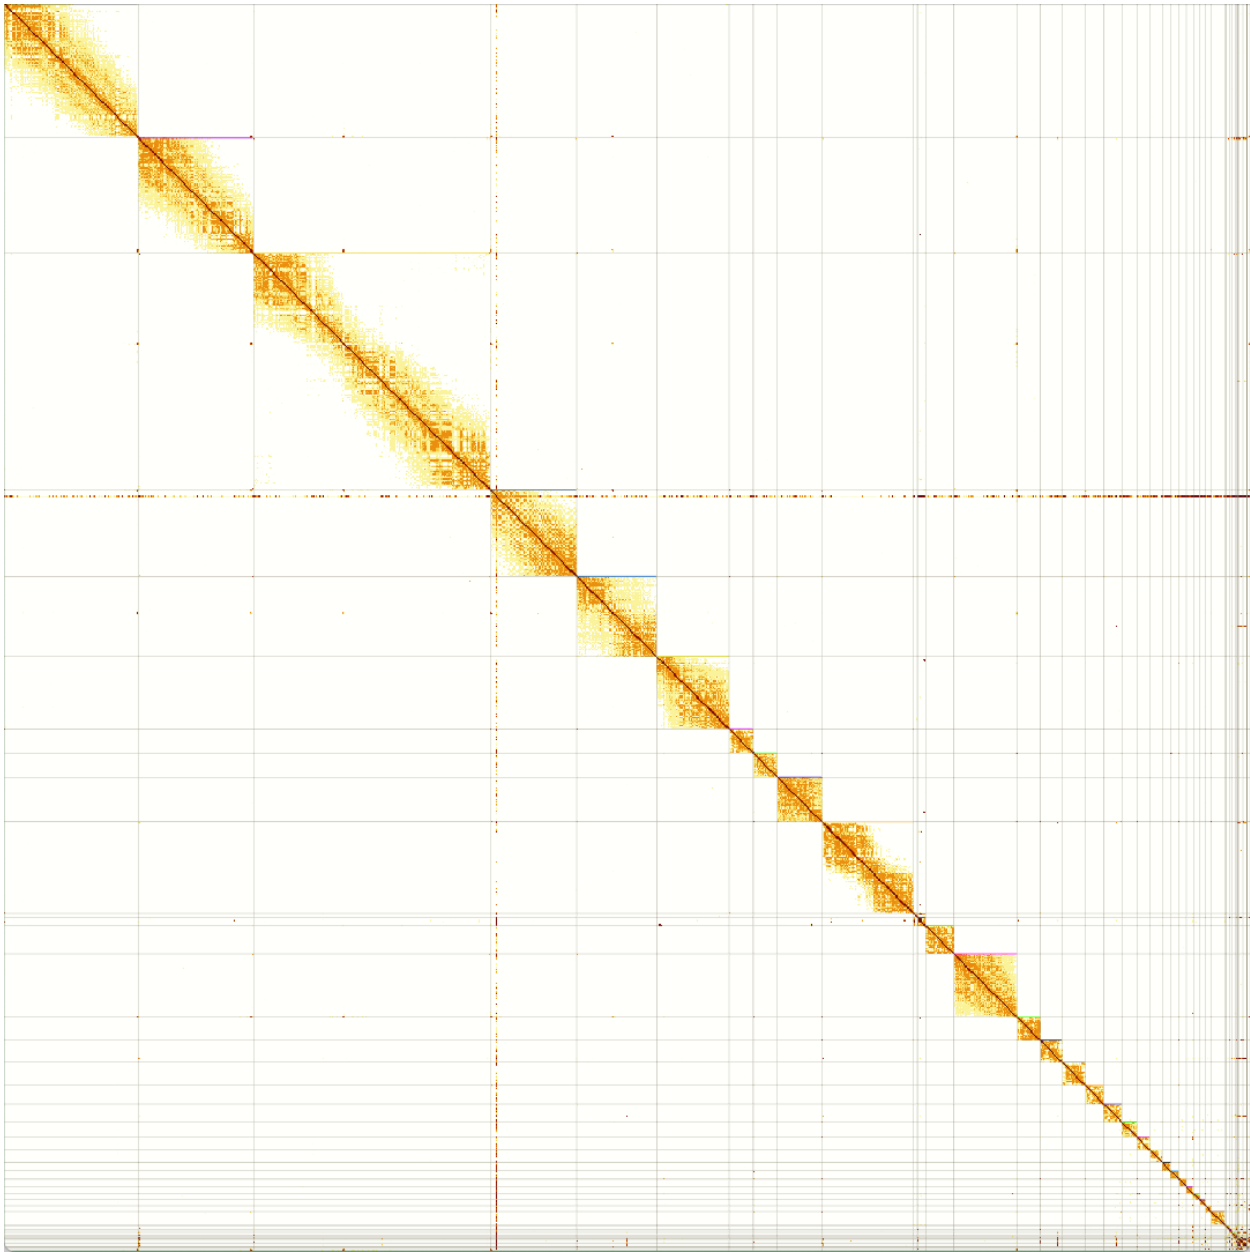

**Figure 4**

Hi-C contact map for the bLagMut1 genome showing long range contacts generated using PretextView (v. 0.2.5).

### **Sequencing and Assembly Results:**

The final assembly sequence is 1,026,771,810 base pairs long, with 71,937 gap bases (0.007%) across 210 spanned gaps. The genome assembly includes 375 contigs arranged on 165 scaffolds. The scaffold N50 is 71,229,700 bp with an L50 of 5. The Contig N50 is 17,905,263 bp with an L50 of 19.

Average coverage across the genome is 57.75x. In total 38 autosomes were identified, with 18 unlocalized sequences among them. Additional W and Z allosomes were described with only a single unlocalized

sequence found on the W. Assembly summary statistics appear significantly better than the current *Gallus gallus* reference genome (GRCg6a), and are modest in comparison to the most recently annotated *Gallus gallus* individual (bGalGal1.mat.broiler.GRCg7b; See Table 1 below). Kmer spectra plots overall showed the expected copy-kmer distributions (See Figure 5 Below).

|                          | <i>Lagopus muta</i><br>Reference Genome<br>(bLagMut1) | <i>Gallus gallus</i><br>Most Recent Annotation<br>(bGalGal1.mat.broiler.GRCg7b) | <i>Gallus gallus</i><br>Reference Genome<br>(GRCg6a) |
|--------------------------|-------------------------------------------------------|---------------------------------------------------------------------------------|------------------------------------------------------|
| Total length             | 1,026,771,810                                         | 1,053,332,251                                                                   | 1,065,348,650                                        |
| Total ungapped length    | 1,026,699,873                                         | 1,049,948,333                                                                   | 1,055,564,190                                        |
| Gaps between scaffolds   | 0                                                     | 0                                                                               | 68                                                   |
| Number of scaffolds      | 165                                                   | 214                                                                             | 524                                                  |
| Scaffold N50             | 71,229,700                                            | 90,861,225                                                                      | 20,785,086                                           |
| Scaffold L50             | 5                                                     | 4                                                                               | 12                                                   |
| Number of contigs        | 375                                                   | 677                                                                             | 1,402                                                |
| Contig N50               | 17,905,263                                            | 18,834,961                                                                      | 17,655,422                                           |
| Contig L50               | 19                                                    | 18                                                                              | 19                                                   |
| Chromosomes and plasmids | 41                                                    | 42                                                                              | 34                                                   |
| Component sequences      | 165                                                   | 677                                                                             | 2,243                                                |

**Table 1**

A series of “global” statistics published in the public release of the Rock Ptarmigan reference genome on NCBI indicating the completeness of the new reference genome in comparison to the gold standard Chicken reference genome and the most recently annotated Chicken reference genome.

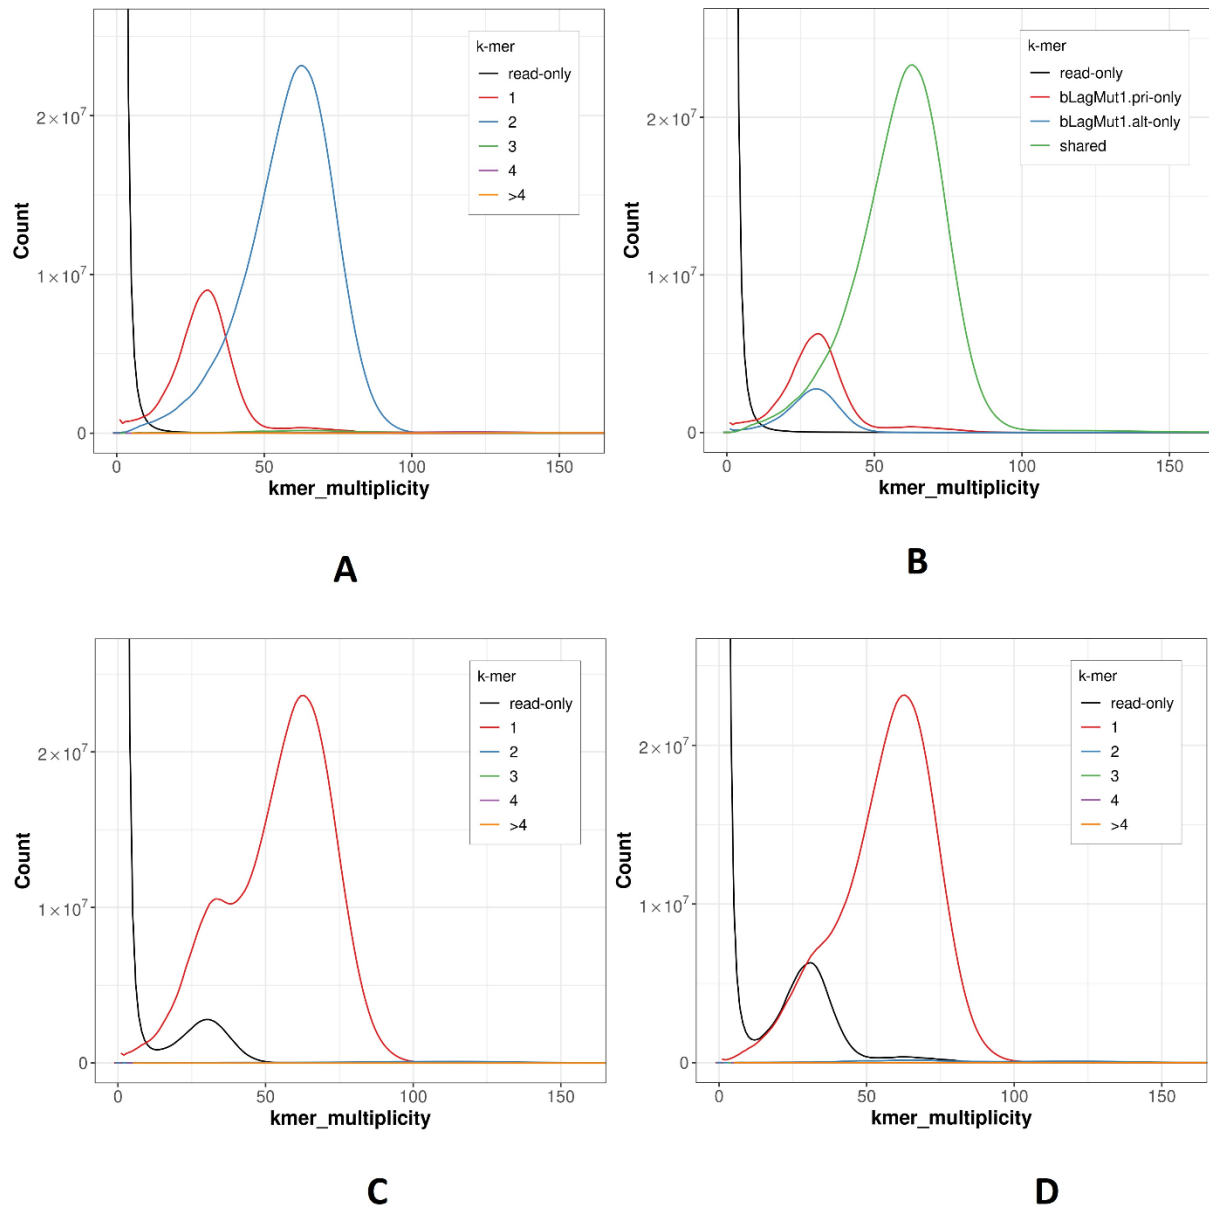

**Figure 5**

Outputs from Merqury showing kmer distribution according to: (A.) Spectra-cn plot of the bLagMut1 complete assembly, (B.) spectra-asm plot of the bLagMut1 complete assembly, (C.) spectra-cn plot of the bLagMut1 primary assembly, and (D.) spectra-cn plot of the bLagMut1 alternate assembly.

### Genome Annotation:

In total 20,110 genes and pseudogenes were identified by combining gene prediction and similarity approaches, with approximately 80% identified as protein coding. The annotated genes showed a 98.6% completeness score against 98.9% for the whole genome when set against the BUSCO avian dataset (aves\_odb10 lineage) and indicating 0.9% of genes missing from the annotated assembly. The annotation



and associate summary statistics are available in NCBI's RefSeq genome record for the reference (Pruitt et al., 2013). The contents of the report are summarized in Table 2.

|                       | <i>Lagopus muta</i><br>Reference Genome Annotation<br>(bLagMut1) | <i>Gallus gallus</i><br>Most Recent Annotation<br>(bGalGal1.mat.broiler.GRCg7b) |
|-----------------------|------------------------------------------------------------------|---------------------------------------------------------------------------------|
| Genes and Pseudogenes | 20,110                                                           | 25,635                                                                          |
| Protein Coding Genes  | 16,078                                                           | 18,023                                                                          |
| Non-Coding Genes      | 3,738                                                            | 7,330                                                                           |
| mRNA                  | 43,785                                                           | 68,670                                                                          |
| lncRNA                | 5,431                                                            | 10,062                                                                          |
| tRNA                  | 306                                                              | 303                                                                             |
| CDSs                  | 43,793                                                           | 68,683                                                                          |
| Introns (mean length) | 206,142 (4,265)                                                  | 241,290 (4,145)                                                                 |
| Exons (mean length)   | 229,018 (394)                                                    | 262,919 (490)                                                                   |
| Mean Gene Size        | 33kb                                                             | 28kb                                                                            |
| Maximum Gene Size     | 1.6 Mb                                                           | 1.3 Mb                                                                          |
| BUSCO Score           | 98.6%                                                            | 98.7%                                                                           |

**Table 2**

Comparative table showing the relative accuracy and completeness of the *Lagopus muta* reference annotation (NCBI *Lagopus muta* Annotation Release 100) against the most recently complete annotation of the chicken genome (NCBI *Gallus gallus* Annotation Release 106).

### **Mitochondrial Genome:**

The mitochondrial DNA was described with all 13 expected protein coding regions and analyzed for accuracy through comparative analysis. With our addition, there are now four extant mitochondrial genomes published for the Rock Ptarmigan; Two from Iceland, one from Japan, and one from Siberia (Sveinsdóttir and Magnússon, 2017; Yonezawa and Nishibori, 2020; Wang et. al., 2017). Using the ClustalW package embedded in BioEdit (Thompson et. al., 1994; Hall, 1999), we found a total of 24 bases divergent from the previously published Icelandic Rock Ptarmigan mitogenome in a manual review. Of these divergences 14 appeared in coding regions and 8 appeared unique to the previously published individual and our calls at those locations were conserved in the other Rock Ptarmigan populations. None of the polymorphisms observed between the populations appeared to be uniquely conserved in the

Icelandic Population. Analysis of pairwise distances using phylogenetic tree software in Mega11 (Tamura et al., 2021) showed clear grouping of the Rock Ptarmigan separated from the Willow Ptarmigan, as previously reported (Sveinsdóttir and Magnússon, 2017).

### **Discussion/Conclusion:**

Our avian reference genome includes a highly complete set of information with 99.994% of the 1.03 Gb described matching to 40 haploid chromosomes and the mitochondria. Other recent works have aimed to unlock the potential provided by Rock Ptarmigan genetics (Kozma et al., 2018; Kozma et al., 2019; Sigmarsson, 2022). As observed for other recently published genomes (Formenti et al., 2022), the new Rock Ptarmigan genome is of comparatively excellent quality (see also Table 1).

Though Rock Ptarmigan has been globally identified as Least Concern by the IUCN in recent years, there have been regional fluctuations in its status and some nations identify the species as threatened due to long term declines (IUCN, 2022; European Commission, 2022; Icelandic Institute of Natural History, 2018). There is evidence that sub-populations of other grouse species may pose important local adaptations necessary for persistence (Oh et al., 2019), making it probable that the Rock Ptarmigan has unique evolutionary adaptations across its range. Further, it is well established that Arctic species such as Rock Ptarmigan may be disproportionately affected by climate change with an expected poleward contraction of species' ranges (Birdlife International, 2015; Kozma et al., 2018). For more disparate populations such as those in the Japanese mountains of Honshu, the European Alps, and the Pyrenees, rising tree lines may entirely squeeze the Rock Ptarmigan out of its montane niches as has been suggested broadly for alpine habitats (Dirnböck et al., 2011; MRI EDW Working Group, 2015), and some closely related species (Jackson et al., 2016). In the context of conservation, having a reference genome available will contribute to our understanding of the species' genetic risks and possible movements in the face of a warming planet (Bay et al., 2018; Kozma et al., 2018).

Many wildlife species are difficult to study at the genomic level due to limited specimen availability and constraints on procurement (Hope et al., 2018; Kemp, 2015). Because the Rock Ptarmigan is a widespread game bird, it is particularly useful for both genomic studies and general investigations into wildlife ecology. Hunters have the potential to contribute robust data regarding the species trends and may continue to contribute both historical and new specimen materials for research (Cretois et al., 2020). Given the species' close cultural connection to some regions and history as a food source (McGovern et al., 2006), the Rock Ptarmigan may benefit from additional conservation efforts from an involved public or concerned hunters and may be a good candidate for flagship status (McGowan et al., 2020).

Future studies into Rock Ptarmigan genomics will benefit from decades of studies into these birds in captivity (Stokkan et al., 1988). Recently, Rock Ptarmigan hatched and raised in captivity have been used for gene expression studies to understand circadian rhythms and investigate the cecal microbiome representing valuable opportunities going forward (Appenroth et al., 2021; Appenroth et al., 2020; Salgado-Flores et al., 2019).

Among avian diversity, the birds in the family Galliformes represent less than 3% of all species but have an outsized impact on global economics with Chickens, Turkeys, Pheasants, Quails, and Grouse all being regularly consumed. Among the available avian genomes (Bravo et al., 2021) those in order Galliformes are represented with 26 species assemblies currently available on NCBI (approximately 5% of all extant; Sayers et al., 2022). Among these, 68 assemblies have been completed and the chicken has been assembled 30 times (for context see Burt, 2005; Li et al., 2022). This highlights a commercial implication

for Rock Ptarmigans as they have many special adaptations that could be of importance to domestic poultry.

Given the usefulness of wild relatives for research into domesticated species (Li et al., 2020; Jackson et al., 2016) the Rock Ptarmigan may prove to be a useful model for understanding other Galliformes. This relationship will surely have limitations in the genomic realm as more distantly related species are less informative at finer scales than those that are closely related (Scutari et al., 2016). However, if the Rock Ptarmigan's genes tailored to arctic landscapes can be used to better understand genetic architecture for cold weather survival, improved forage capabilities, or other ancestral traits, then important pathways may be identified for commercially exploited birds or other species of conservation interest.

Taking all of this into consideration, the availability of a Rock Ptarmigan reference genome makes the species exceptionally well positioned for investigation across a broad new range of scientific inquiry. With links to arctic/alpine biomes, conservation, hunting culture, and industry, the Rock Ptarmigan reference genome provides a unique opportunity to investigate a species at the intersection of many issues of global significance.

### **Significance statement:**

The Rock Ptarmigan is a widespread bird species of economic and nutritional importance to large portions of the northern hemisphere. Only a tiny fraction of the Rock Ptarmigan's genome was previously reported and studied. The effort undertaken to sequence and annotate the whole genome provides an ability to understand the species at a molecular level. This vertebrate genome allows for new critical assessment of the Rock Ptarmigan and related species at the individual, population, and environmental scales.

### **Conflicts of Interest:**

We declare no conflicts of interest.

**Acknowledgments:** We wish to express our thanks to Ignas Bunikis at SciLifeLab, Uppsala, for assistance with the assembly and scaffolding work. We also wish to extend our appreciation to Ólafur Þ. Magnússon at deCODE genetics, Reykjavik, for arranging RNAseq.

### **Funding:**

The study was financed by the Ptarmigan Ecogenomics project funded by a grant from the Icelandic Research Fund (IRF) (Rannis nr. 206529-051) under the purview of Kristinn P. Magnússon. Additional funding was provided by Jacob Höglund with grant VR 2018-04635.

### **Data Availability Statement:**

The final annotation has been publicly released and uploaded according to the high standards of the Earth BioGenome Project (Lewin et al., 2018). The genome assembly, including the raw shotgun sequencing

data, and the mitochondrial genome has been uploaded to NCBI and is available at [https://www.ncbi.nlm.nih.gov/assembly/GCA\\_023343835.1](https://www.ncbi.nlm.nih.gov/assembly/GCA_023343835.1); BioProject: PRJNA836583; BioSample: SAMN25144835

## **References:**

Allio, R, Schomaker-Bastos, A, Romiguier, J, Prosdocimi, F, Nabholz, B, Delsuc, F. MitoFinder: Efficient automated large-scale extraction of mitogenomic data in target enrichment phylogenomics. *Mol Ecol Resour.* 2020; 00: 1– 14. <https://doi.org/10.1111/1755-0998.13160>

Appenroth, D., G. Wagner, D. Hazlerigg, and A. West. 2021. Evidence for circadian based photoperiodic timekeeping in Svalbard ptarmigan, the northernmost resident bird. *Current Biology* 31(12):2720-2727. <https://doi.org/10.1016/j.cub.2021.04.009>

Appenroth, D., Vebjørn J. Melum, Alexander C. West, Hugues Dardente, David G. Hazlerigg, Gabriela C. Wagner; Photoperiodic induction without light-mediated circadian entrainment in a High Arctic resident bird. *J Exp Biol* 15 August 2020; 223 (16): jeb220699. doi: <https://doi.org/10.1242/jeb.220699>

Bay, R. A., Harrigan, R. J., Underwood, V. L., Gibbs, H. L., Smith, T. B., & Rugg, K. 2018. Genomic signals of selection predict climate-driven population declines in a migratory bird. *Science*, 359(6371), 83–86. doi: 10.1126/science.aan4380

Bernt, M., Donath A., Jühling F., Externbrink F., Florentz C., Fritsch G., Pütz J., Middendorf M., and Stadler P. F. 2013. MITOS: improved de novo metazoan mitochondrial genome annotation. *Mol Phylogenet Evol.* 69:313-319.

BirdLife International. 2015. Climate change is driving poleward shifts in the distributions of species. Downloaded from <http://www.birdlife.org>

Bravo, G.A., C. J. Schmitt, and S. V. Edwards. 2021. What Have We Learned from the First 500 Avian Genomes? *Annual Review of Ecology, Evolution, and Systematics* 52(1): 611-639

Brynjarsdóttir J, Lund SH, Magnússon KG, and Nielsen ÓK. 2003. Analysis of timeseries for rock ptarmigan and gyrfalcon populations in north-east Iceland. RH-18-2003, Raunvísindastofnun Háskólans, Háskóli Íslands

Burt DW. Chicken genome: current status and future opportunities. *Genome Res.* 2005 Dec;15(12):1692-8. doi: 10.1101/gr.4141805. PMID: 16339367.

Chamberlain, D., Arlettaz, R., Caprio, E., Maggini, R., Pedrini, P., Rolando, A., & Zbinden, N. 2012. The altitudinal frontier in avian climate impact research. *Ibis*, 154, 205–209. <https://doi.org/10.1111/j.1474-919X.2011.01196.x>

Cheng, H., Concepcion, G.T., Feng, X., Zhang, H., Li H. (2021) Haplotype-resolved de novo assembly using phased assembly graphs with hifiasm. *Nat Methods*, 18:170-175. <https://doi.org/10.1038/s41592-020-01056-5>

Chow, W., Kim Brugger, Mario Caccamo, Ian Sealy, James Torrance, Kerstin Howe, gEVAL — a web-based browser for evaluating genome assemblies, *Bioinformatics*, Volume 32, Issue 16, August 2016, Pages 2508–2510, <https://doi.org/10.1093/bioinformatics/btw159>

Clark, Karen, Ilene Karsch-Mizrachi, David J. Lipman, James Ostell, and Eric W. Sayers. 2016. GenBank. *Nucleic Acids Res.* 2016 Jan 4; 44(Database issue): D67–D72. <https://doi.org/10.1093/nar/gkv1276>

Costanzi, Jean-Marc, and Øyvind Steifetten. 2019. Island biogeography theory explains the genetic diversity of a fragmented rock ptarmigan (*Lagopus muta*) population. *Ecology and Evolution* 9(7):3837-3849. <https://doi.org/10.1002/ece3.5007>

Cretois, B., J. Linnell, M. Grainger, E. Nilsen, J. Rød. 2020. Hunters as citizen scientists: Contributions to biodiversity monitoring in Europe. *Global Ecology and Conservation* 23:e01077. <https://doi.org/10.1016/j.gecco.2020.e01077>.

Dirnböck, T., F. Essl, and W. Rabitsch. 2011. Disproportional risk for habitat loss of high-altitude endemic species under climate change. *Global Change Biology*, 17: 990-996. <https://doi.org/10.1111/j.1365-2486.2010.02266.x>

Dobin A, Davis CA, Schlesinger F, Drenkow J, Zaleski C, Jha S, Batut P, Chaisson M, Gingeras TR. STAR: ultrafast universal RNA-seq aligner. *Bioinformatics*. 2013 Jan 1;29(1):15-21. doi: 10.1093/bioinformatics/bts635. Epub 2012 Oct 25. PMID: 23104886; PMCID: PMC3530905.

European Commission, Directorate-General for Environment, European red list of birds 2021, European Commission, 2022, <https://data.europa.eu/doi/10.2779/959320>

Formenti, Giulio & Theissinger, Kathrin & Fernandes, Carlos & Bista, Iliana & Bombarely, Aureliano & Bleidorn, Christoph & Ciofi, Claudio & Crottini, Angelica & Godoy, José & Höglund, Jacob & Malukiewicz, Joanna & Alice, Mouton & Oomen, Rebekah & Paez, Sadye & Palsbøll, Per & Pampoulie, Christophe & Ruiz-López, María & Svardal, Hannes & Theofanopoulou, Constantina & Meiri, Shai. (2022). The era of reference genomes in conservation genomics. *Trends in Ecology & Evolution*. 37. 10.1016/j.tree.2021.11.008.

Gardarsson, A.(1988).Cyclic population changes and some related events in rockptarmigan in Iceland. Pages 259-265 inAdaptive strategies and population ecology of northern grouse(A. T. Bergerud, and M. W. Gratson, Eds.). University of MinnesotaPress, Minneapolis

Guan D, McCarthy SA, Wood J, Howe K, Wang Y, Durbin R. Identifying and removing haplotypic duplication in primary genome assemblies. *Bioinformatics*. 2020 May 1;36(9):2896-2898. doi: 10.1093/bioinformatics/btaa025. PMID: 31971576; PMCID: PMC7203741.

Hall, T.A. 1999. BioEdit: A User-Friendly Biological Sequence Alignment Editor and Analysis Program for Windows 95/98/NT. *Nucleic Acids Symposium Series*, 41, 95-98.

Hope, A., B. Sandercock, and J. Malaney. 2018. Collection of Scientific Specimens: Benefits for Biodiversity Sciences and Limited Impacts on Communities of Small Mammals. *BioScience* 68(1): 35–42. <https://doi.org/10.1093/biosci/bix141>

Howe, K., William Chow, Joanna Collins, Sarah Pelan, Damon-Lee Pointon, Ying Sims, James Torrance, Alan Tracey, Jonathan Wood, Significantly improving the quality of genome assemblies through curation, *GigaScience*, Volume 10, Issue 1, January 2021, g1aa153, <https://doi.org/10.1093/gigascience/g1aa153>

Höglund, J., Laurila, A., & Rödin-Mörch, P. 2021. Population Genomics and Wildlife Adaptation in the Face of Climate Change. In P. A. Hohenlohe & O. P. Rajora (Eds.), *Population Genomics: Wildlife*, 333–355. Springer International Publishing. doi: 10.1007/13836\_2019\_69

Icelandic Institute of Natural History. 2018. IINH Red List for Birds of Iceland. <https://www.ni.is/en/resources/publications/red-lists/fuglar>

IUCN. 2022. The IUCN Red List of Threatened Species. Version 2022-2. <https://www.iucnredlist.org>

Jackson MM, Gergel SE, Martin K. Effects of Climate Change on Habitat Availability and Configuration for an Endemic Coastal Alpine Bird. *PLoS One*. 2015 Nov 3;10(11):e0142110. doi: 10.1371/journal.pone.0142110. Erratum in: *PLoS One*. 2016;11(1):e0146838. PMID: 26529306; PMCID: PMC4631505.

Kalvari, I., Eric P Nawrocki, Nancy Ontiveros-Palacios, Joanna Argasinska, Kevin Lamkiewicz, Manja Marz, Sam Griffiths-Jones, Claire Toffano-Nioche, Daniel Gautheret, Zasha Weinberg, Elena Rivas, Sean R Eddy, Robert D Finn, Alex Bateman, Anton I Petrov, Rfam 14: expanded coverage of metagenomic, viral and microRNA families, *Nucleic Acids Research*, Volume 49, Issue D1, 8 January 2021, Pages D192–D200, <https://doi.org/10.1093/nar/gkaa1047>

Kapustin Y, Souvorov A, Tatusova T, Lipman D. Splign: algorithms for computing spliced alignments with identification of paralogs. *Biol Direct*. 2008 May 21;3:20. doi: 10.1186/1745-6150-3-20. PMID: 18495041; PMCID: PMC2440734.

Kemp C. 2015. Museums: The endangered dead. *Nature* 518: 293 <https://doi.org/10.1038/518292a>

Kerpedjiev, P., Abdennur, N., Lekschas, F. et al. HiGlass: web-based visual exploration and analysis of genome interaction maps. *Genome Biol* 19, 125 (2018). <https://doi.org/10.1186/s13059-018-1486-1>

Kozma R, Lillie M, Benito BM, Svenning J-C, Höglund J. 2018. Past and potential future population dynamics of three grouse species using ecological and whole genome coalescent modeling. *Ecol Evol*. 8(13) 6671-6681. <https://doi.org/10.1002/ece3.4163>

Kozma, R., Rödin-Mörch, P. & Höglund, J. Genomic regions of speciation and adaptation among three species of grouse. *Sci Rep* 9, 812 (2019). <https://doi.org/10.1038/s41598-018-36880-5>

Lewin HA, Robinson GE, Kress WJ, Baker WJ, Coddington J, Crandall KA, et al. 2018. Earth BioGenome Project: Sequencing life for the future of life". *Proceedings of the National Academy of Sciences of the United States of America*. 115 (17): 4325–4333. doi:10.1073/pnas.1720115115

Li, M., C. Sun, N. Xu, P. Bian, X. Tian, X. Wang, Y. Wang, X. Jia, R. Heller, M. Wang, F. Wang, X. Dai, R. Luo, Y. Guo, X. Wang, P. Yang, D. Hu, Z. Liu, W. Fu, S. Zhang, X. Li, C. Wen, F. Lan, A. Siddiki, C. Suwannapoom, X. Zhao, Q. Nie, X. Hu, Y. Jiang, N. Yang. 2022. De Novo Assembly of 20

Chicken Genomes Reveals the Undetectable Phenomenon for Thousands of Core Genes on Microchromosomes and Subtelomeric Regions. *Molecular Biology and Evolution*, 39(4). <https://doi.org/10.1093/molbev/msac066>

Li, X., Yang, J., Shen, M. et al. Whole-genome resequencing of wild and domestic sheep identifies genes associated with morphological and agronomic traits. *Nat Commun* 11, 2815 (2020). <https://doi.org/10.1038/s41467-020-16485-1>

Lucchini, V., J. Höglund, S. Klaus, J. Swenson, E. Randi. 2001. Historical Biogeography and a Mitochondrial DNA Phylogeny of Grouse and Ptarmigan. *Molecular Phylogenetics and Evolution* 20(1):149-162. <https://doi.org/10.1006/mpev.2001.0943>.

Marçais G, Delcher AL, Phillippy AM, Coston R, Salzberg SL, Zimin A. MUMmer4: A fast and versatile genome alignment system. *PLoS computational biology*. 2018 Jan 26;14(1):e1005944.

Masanobu, H., I. Tsuyama, K. Nakao, M. Ozeki, M. Higa, Y. Kominami, T. Hamada, T. Matsui, M. Yasuda, and N. Tanaka. 2019. Modeling future wildlife habitat suitability: serious climate change impacts on the potential distribution of the Rock Ptarmigan *Lagopus muta japonica* in Japan's northern Alps. *BMC Ecol* 19:23, <https://doi.org/10.1186/s12898-019-0238-8>

McGovern, T. H., Perdikaris, S., Einarsson, Á., & Sidell, J. 2006. Coastal connections, local fishing, and sustainable egg harvesting: patterns of Viking Age inland wild resource use in Mývatn district, Northern Iceland. *Environmental Archaeology*, 11(2), 187–205. doi:10.1179/174963106x123205

McGowan, J., Beaumont, L.J., Smith, R.J. et al. Conservation prioritization can resolve the flagship species conundrum. *Nat Commun* 11, 994 (2020). <https://doi.org/10.1038/s41467-020-14554-z>

Manni, M., Matthew R Berkeley, Mathieu Seppey, Felipe A Simão, Evgeny M Zdobnov, BUSCO Update: Novel and Streamlined Workflows along with Broader and Deeper Phylogenetic Coverage for Scoring of Eukaryotic, Prokaryotic, and Viral Genomes. *Molecular Biology and Evolution*, Volume 38, Issue 10, October 2021, Pages 4647–4654

Morgulis A, Gertz EM, Schäffer AA, Agarwala R. WindowMasker: window-based masker for sequenced genomes. *Bioinformatics*. 2006 Jan 15;22(2):134-41. doi: 10.1093/bioinformatics/bti774. Epub 2005 Nov 15. PMID: 16287941.



Mountain Research Initiative EDW Working Group. 2015. Elevation-dependent warming in mountain regions of the world. *Nature Clim Change* 5, 424–430. <https://doi.org/10.1038/nclimate2563>

Nakamura, H. 2014. Rock Ptarmigan. Red Data Book 2014: Endangered Wildlife of Japan 2 Birds (Rare Species Conservation Promotion Office, Wildlife Division, Natural Environment Bureau, Ministry of the Environment, Gyosei Co., Ltd., 2014), pp. 100-101 ((In Japanese))

Nielsen, O.K.(1986). Population ecology of the gyrfalcon in Iceland with comparative notes on the merlin and the raven. Ph.D. thesis, Cornell University, Ithaca

Nielsen ÓK and Pétursson G.(1995). Population fluctuations of gyrfalcon and rock ptarmigan: analysis of export figures from Iceland. *Wildlife Biology*, 1: 65-71.

Nielsen O.K.(1999). Gyrfalcon predation on ptarmigan: numerical and functional responses. *Journal of Animal Ecology*, 68: 1034-1050

Nielsen ÓK, Brynjarsdóttir J, and Magnússon KG.(2004). Monitoring of the ptarmigan population in Iceland 1999–2003. *Fjölrit Náttúrufræðistofnunar* (in Icelandic with English summary), 47:1–110

Nielsen ÓK. (2011). Gyrfalcon population and reproduction in relation to Rock Ptarmigan numbers in Iceland. In R. T. Watson, T. J. Cade, M. Fuller, G. Hunt and E. Potapov (Eds.), *Gyrfalcons and ptarmigans in a changing world* (pp. 21–48). Boise, ID: The Peregrine Fund

Persons, N.W., P.A. Hosner, K.A. Meiklejohn, E.L. Braun, and R.T. Kimball. 2016. Sorting out relationships among the grouse and ptarmigan using intron, mitochondrial, and ultra-conserved element sequences. *Mol. Phy. and Evo.* 98:123-132. <https://doi.org/10.1016/j.ympev.2016.02.003>

Pruitt KD, Brown GR, Hiatt SM, Thibaud-Nissen F, Astashyn A, Ermolaeva O, Farrell CM, Hart J, Landrum MJ, McGarvey KM, Murphy MR, O'Leary NA, Pujar S, Rajput B, Rangwala SH, Riddick LD, Shkeda A, Sun H, Tamez P, Tully RE, Wallin C, Webb D, Weber J, Wu W, DiCuccio M, Kitts P, Maglott DR, Murphy TD, Ostell JM. RefSeq: an update on mammalian reference sequences. *Nucleic Acids Res.* 2014 Jan;42(Database issue):D756-63. doi: 10.1093/nar/gkt1114. Epub 2013 Nov 19. PMID: 24259432; PMCID: PMC3965018.

Rhie, A., McCarthy, S.A., Fedrigo, O. et al. Towards complete and error-free genome assemblies of all vertebrate species. *Nature* 592, 737–746 (2021). <https://doi.org/10.1038/s41586-021-03451-0>

Rhie, A., Walenz, B.P., Koren, S. et al. Merqury: reference-free quality, completeness, and phasing assessment for genome assemblies. *Genome Biol* 21, 245 (2020). <https://doi.org/10.1186/s13059-020-02134-9>

Sahlman, T., G. Segelbacher, and J. Höglund. 2009. Islands in the ice: colonisation routes for rock ptarmigan to the Svalbard archipelago. *Ecogeography* 32(5): 840-848.  
<http://www.jstor.org/stable/20696293>

Salgado-Flores A, Tveit AT, Wright A-D, Pope PB, Sundset MA (2019) Characterization of the cecum microbiome from wild and captive rock ptarmigans indigenous to Arctic Norway. *PLoS ONE* 14(3): e0213503. <https://doi.org/10.1371/journal.pone.0213503>

Sayers EW, Bolton EE, Brister JR, Canese K, Chan J, Comeau DC, Connor R, Funk K, Kelly C, Kim S, Madej T, Marchler-Bauer A, Lanczycki C, Lathrop S, Lu Z, Thibaud-Nissen F, Murphy T, Phan L, Skripchenko Y, Tse T, Wang J, Williams R, Trzaskowski B, Pruitt KD, Sherry ST. Database resources of the national center for biotechnology information. *Nucleic Acids Res.* 2022 Jan 7;50(D1):D20-D26. doi: 10.1093/nar/gkab1112. PMID: 34850941; PMCID: PMC8728269.

Scheffers, BR., J. Watson, D. Bickford, C. Mora, T. Martin, W. Foden, C. Rondinini, M. Pacifici, D. Dudgeon, K. Kovacs, P. Pearce-Kelly, S. Butcharct, R. Corlett, J. Pandolfi, A. Hoffmann, T. Bridge, L. Meester. 2016. The broad footprint of climate change from genes to biomes to people. *Science* 354(354): 111-114. doi: 10.1126/science.aaf7671

Scridel, D., Brambilla, M., Martin, K., Lehtikainen, A., Iemma, A., Matteo, A., Jähnig, S., Caprio, E., Bogliani, G., Pedrini, P., Rolando, A., Arlettaz, R. and Chamberlain, D. (2018), A review and meta-analysis of the effects of climate change on Holarctic mountain and upland bird populations. *Ibis*, 160: 489-515. <https://doi.org/10.1111/ibi.12585>

Scutari M, Mackay I, Balding D (2016) Using Genetic Distance to Infer the Accuracy of Genomic Prediction. *PLOS Genetics* 12(9): e1006288. <https://doi.org/10.1371/journal.pgen.1006288>

Sigmarsdóttir, E.S. 2022. Bachelor's Thesis on development of a qPCR assay for molecular sexing of three Icelandic bird species. University of Akureyri.

Stokkan, Karl-Arne, Peter J. Sharp, Ian C. Dunn, Robert W. Lea. 1988. Endocrine changes in photostimulated willow ptarmigan (*Lagopus lagopus lagopus*) and Svalbard ptarmigan (*Lagopus mutus hyperboreus*). *General and Comparative Endocrinology*, 70(1): 169-177

Sveinsdóttir M, Magnússon KP. Complete mitochondrial genome and phylogenetic analysis of willow ptarmigan (*Lagopus lagopus*) and rock ptarmigan (*Lagopus muta*) (Galliformes: Phasianidae: Tetraoninae). *Mitochondrial DNA B Resour.* 2017 Jul 11;2(2):400-402. doi: 10.1080/23802359.2017.1347834

Tamura, Koichiro, Glen Stecher, and Sudhir Kumar. 2021. MEGA11: Molecular Evolutionary Genetics Analysis version 11. *Molecular Biology and Evolution* 38:3022-3027

Thompson, J.D., D. G. Higgins, and T. J. Gibson. 1994. CLUSTAL W: improving the sensitivity of progressive multiple sequence alignment through sequence weighting, position-specific gap penalties and weight matrix choice. *Nucleic Acids Res.* 22(22): 4673–4680. doi: 10.1093/nar/22.22.4673

Uliano-Silva, Marcela, João Gabriel Ferreira Nunes, Ksenia Krasheninnikova, & Shane A. McCarthy. (2021). marcelauliano/MitoHiFi: mitohifi\_v2.0 (v2.0). Zenodo. <https://doi.org/10.5281/zenodo.5205678>

Wang N, Hosner PA, Liang B, Braun EL, Kimball RT. Historical relationships of three enigmatic phasianid genera (Aves: Galliformes) inferred using phylogenomic and mitogenomic data. *Mol Phylogenet Evol.* 2017 Apr;109:217-225. doi: 10.1016/j.ympev. 2017.01.006. Epub 2017 Jan 11. PMID: 28088402.

Yonezawa, Takahiro, and Masahide Nishibori. 2020. The complete mitochondrial genome of the Japanese rock ptarmigan (*Lagopus muta japonica* Clark, 1907). *Mitochondrial DNA Part B.* 5(2): 1648-1649. <https://doi.org/10.1080/23802359.2020.1746207>
